# Supplementary material
Source: publisher figshare collection journal article supplement (https://wiley.figshare.com/articles/dataset/_/3529961)
Supplement: Supplementary file 1 [file 1]

***Ecological Archives* E089-153-A1**

**J. Harte, T. Zillio, E. Conlisk, and A. B. Smith. 2008. Maximum entropy and the state variable approach to macroecology. *Ecology* 89:2700–2711.**

## APPENDIX A: The MaxEnt Machinery

We seek the least biased estimate of the functional form of a probability distribution  $p(n)$  that is subject to a set of  $K$  constraints that are accepted from prior knowledge and that can be expressed in the form of  $K$  equations:

$$\sum_n f_k(n) p(n) = \langle f_k \rangle \quad (\text{A.1})$$

where  $n$  is summed over all of its possible values,  $\langle f_k \rangle$  is the numerical value of the average of  $f_k$ , and the index  $k$  runs from 1 to  $K$ . It was shown by Jaynes (9) that the best inference as to the shape of  $p(n)$  is the function that maximizes the “information entropy”

$$I = - \sum_n p(n) \ln(p(n)) \quad (\text{A.2})$$

subject to those constraints. Maximization is carried out using the method of Lagrange multipliers. We are assuming a uniform reference entropy here (sensu Jaynes) because we can construct the continuous formulation of the problem as the limiting case of a discrete formulation and because there is no a priori reason to choose anything other than a uniform reference. The maximization procedure yields:

$$p(n) = \frac{e^{-\sum_{k=1}^K \lambda_k f_k(n)}}{Z(\lambda_1, \lambda_2, \dots, \lambda_K)} \quad (\text{A.3})$$

where  $Z$ , the partition function, is given by:

$$Z(\lambda_1, \lambda_2, \dots, \lambda_K) = \sum_n e^{-\sum_{k=1}^K \lambda_k f_k(n)} \quad (\text{A.4})$$

and the  $\lambda_k$  are given by the solutions to:

$$\frac{\partial \ln(Z)}{\partial \lambda_k} = -\langle f_k \rangle \quad (\text{A.5})$$

A practical example of the use of this equation is in Appendix B. Eqs. A.1 to A.5 readily generalize to joint probability distributions, such as  $R(n, \varepsilon)$  in the text.
